# Supplementary material for: The Efficacy of Mycophenolate Mofetil in Remission Maintenance Therapy for Microscopic Polyangiitis and Granulomatosis with Polyangiitis
Source: PubMed Central journal article supplement — Yonsei Med J. 2021 May 14;62(6):494–502. doi: 10.3349/ymj.2021.62.6.494 (PMC8149928; doi:10.3349/ymj.2021.62.6.494), 2021-05-14
Supplement: ymj-62-494-s001.pdf [file ymj-62-494-s001.pdf]

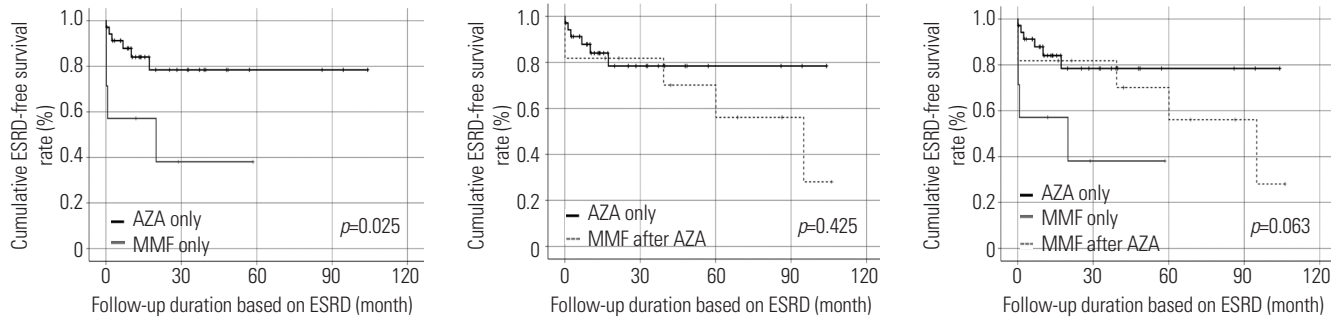

**Supplementary Fig. 1.** Comparison of cumulative ESRD-free survival rates in 53 patients with renal manifestation at diagnosis. Patients taking MMF only showed a lower cumulative ESRD-free survival rate than those taking AZA only ( $p=0.025$ ); however, ESRD-survival rates did not differ between patients taking MMF after AZA and those taking AZA only or between patients taking MMF only and those with MMF after AZA. ESRD, end-stage renal disease; MMF, mycophenolate mofetil; AZA, azathioprine.
